# Supplementary material
Source: PubMed Central journal article supplement (PMC4490904)
Supplement: NIHMS4709-supplement-Supplementary_data.pdf [file NIHMS4709-supplement-Supplementary_data.pdf]

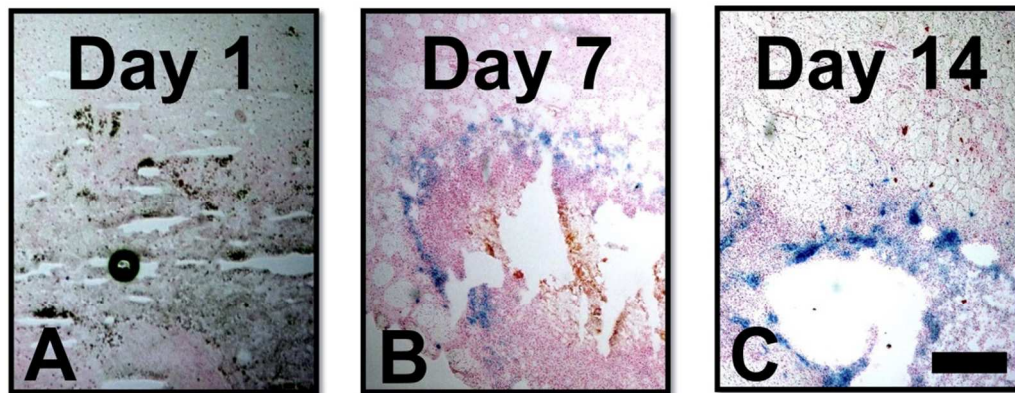

**Supporting Information Figure 1:** Perls histochemistry at day 1, day 7 and day 14 post ICH. Perls positive staining (blue) is observed in tissue 7 and 14 days post ICH, but the tissue is Perls negative 1 day post ICH, in agreement with the literature.<sup>1</sup> The hematoma boundary can still be observed by brown colouration in the tissue 1 day post ICH, which is not specific to the Perls stain, but rather the natural pigment of blood.<sup>1</sup> Scale bar = 500  $\mu$ m

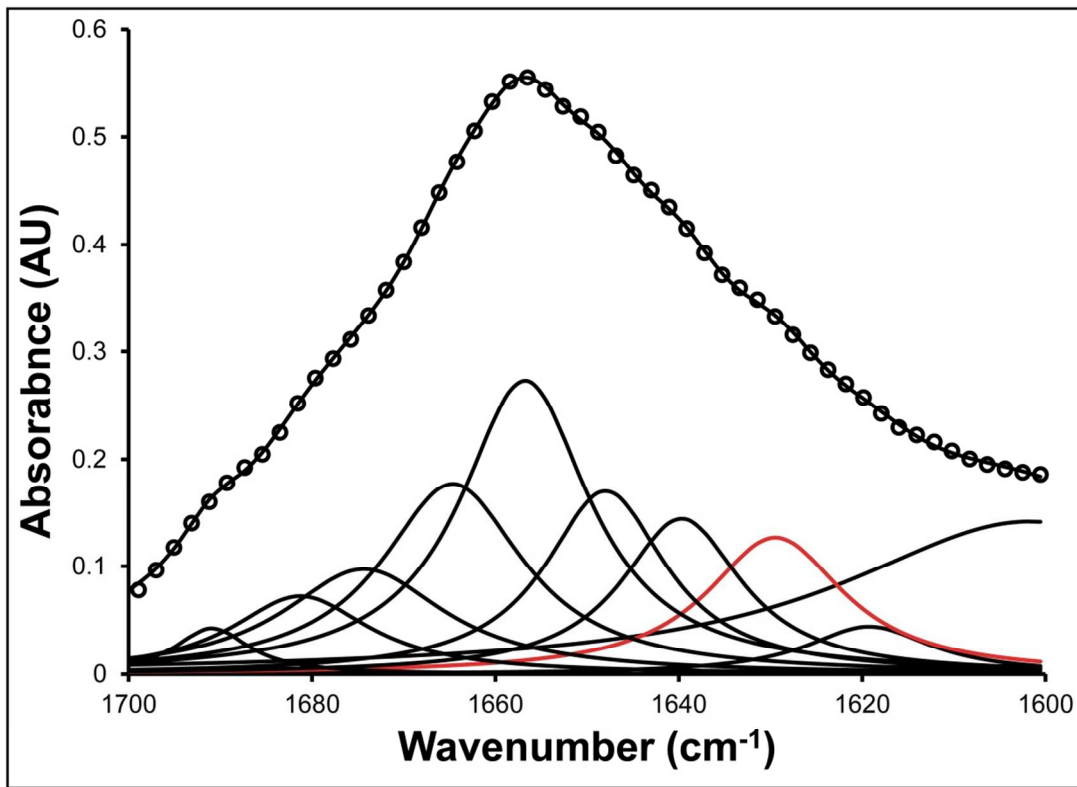

**Supporting Information Figure 2:** Representative example of curve fitting approach. Black circles indicate raw data, black lines indicate individual components and fitted data. Red component is assigned to aggregated proteins, centered at 1625 cm<sup>-1</sup>.

## XFI Detection Limits

The minimum detection limit (MDL) was calculated for each element (P, S, Cl, K, Ca, Fe, Cu, Zn) for a 95 % confidence limit according to the following equation<sup>2</sup>:

$$\text{MDL} = 2 * I_{(\text{background})} * C / I_{(\text{standard})}$$

Where  $I_{(\text{background})}$  is the fluorescence intensity (number of counts) collected on the blank background where the element concentration is 0 (or assumed to be 0),  $C$  is the concentration of the standard ( $\mu\text{g cm}^{-2}$ ) and  $I_{(\text{standard})}$  is the fluorescence intensity (number of counts) collected for the standard. The minimum detection limits reported to two significant figures are provided in Table 1. The minimum detection limits demonstrate that a minimum level of  $0.082 \mu\text{g cm}^{-2}$  of Fe can be detected, and a difference in Fe concentration as small as  $0.082 \mu\text{g cm}^{-2}$  between two experimental groups can be detected in this study with a 95 % confidence limit.

Table 1: XFI minimum detection limits of elements

| Element | Minimum Detection Limit ( $\mu\text{g cm}^{-2}$ ) |
|---------|---------------------------------------------------|
| P       | 1.7                                               |
| S       | 2.0                                               |
| Cl      | 2.3                                               |
| K       | 0.88                                              |
| Ca      | 0.24                                              |
| Fe      | 0.081                                             |
| Cu      | 0.022                                             |
| Zn      | 0.0012                                            |

## References

1. Liu, S., Grigoryan, M. M., Vasilevko, V., Sumbria, R. K., Paganini-Hill, A., Cribbs, D. H., and Fisher, M. J. (2014) Comparative Analysis of H&E and Prussian Blue Staining in a Mouse Model of Cerebral Microbleeds, *Journal of Histochemistry & Cytochemistry* 62, 767-773.
2. Taylor, J. R. (1997) *An Introduction to Error Analysis*, 2 ed., University Science Books, California, USA.
